# Shaping the zebrafish myotome by differential friction and active stress

S. Tlili<sup>#,1</sup>, J. Yin<sup>#,1</sup>, J.-F. Rupprecht<sup>1</sup>, G. Weissbart<sup>1</sup>, J. Prost<sup>1,2</sup> and T. E. Saunders<sup>\*1,3,4</sup>

<sup>1</sup>*Mechanobiology Institute, National University of Singapore, 5A Engineering Drive 1, 117411, Singapore.*

<sup>2</sup>*Laboratoire Physico Chimie Curie, Institut Curie,*

*PSL Research University, CNRS UMR168, 75005 Paris, France.*

<sup>3</sup>*Department of Biological Sciences, National University of Singapore, Singapore.*

<sup>4</sup>*Institute of Molecular and Cell Biology, Agency for Science, Technology and Research (A\*Star), Biopolis 138673, Singapore.*

<sup>#</sup> denotes equal contribution.

\* for correspondence: [dbsste@nus.edu.sg](mailto:dbsste@nus.edu.sg)

(Dated: December 22, 2018)

Organ formation is an inherently biophysical process, requiring large-scale tissue deformations. Yet, understanding how complex organ shape emerges during development remains a major challenge. During fish embryogenesis, large muscle segments, called myotomes, acquire a characteristic chevron morphology, which is believed to play a role in swimming. The final myotome shape can be altered by perturbing muscle cell differentiation or by altering the interaction between myotomes and surrounding tissues during morphogenesis. To disentangle the mechanisms contributing to shape formation of the myotome, we combine single-cell resolution live imaging with quantitative image analysis and theoretical modeling. We find that, soon after its segmentation from the presomitic mesoderm, the future myotome spreads across the underlying tissues. The mechanical coupling between the myotome and the surrounding tissues is spatially varying, resulting in spatially heterogeneous friction. Using a vertex model, we show that the interplay of differential spreading and friction is sufficient to drive the initial phase of myotome shape formation. However, we find that active stresses, generated during muscle cell differentiation, are necessary to reach the acute angle of the myotome observed in wildtype embryos. A final ingredient for formation and maintenance of the chevron shape is tissue plasticity, which is mediated by orientated cellular rearrangements. Our work sheds a new light on how a spatio-temporal sequence of local cellular events can have a non-local and irreversible mechanical impact at the tissue scale, leading to robust organ shaping.

The formation of complex organ shape requires the integration of genetic information [1–4] with mechanical processes such as directed cell division and rearrangements [5–11] and interactions between tissues [12]. The highly robust form of organs [7] suggests that forming a precise shape is essential. However, it remains an open question how different biophysical and genetic processes dynamically interact during organogenesis [13].

In the zebrafish embryo, precursors of myotomes, somites, start to bend into a chevron shape soon after segmentation [14]. Posterior trunk and tail somites emerge from the presomitic mesoderm (PSM), Fig. 1a., whilst anterior counterparts are generated from the mesoderm during gastrulation. Somites are specified by periodic segmentation around every 30 min [14–16] and they give rise to slow and fast-twitch muscle fibres, dermomyotome and various types of progenitor cells [17–21]. The developmental stage of a specific somite is denoted by SN, where N counts the number of already formed somites, with a newly specified somite denoted as stage S1, Fig. 1a. The final myotome consists of slow muscle fibres, whose progenitors are initially located close to the notochord, and multinucleated fast fibres, whose progenitors are initially located more laterally, Fig. 1b.

The mature myotome has a distinctive V (“chevron”) shape, [14], Fig. 1a, which is thought to be important for swimming [22]. A number of hypotheses have been proposed to explain chevron formation, including roles for: the swimming motion itself [23]; older myotome seg-

ments acting as templates for younger segments [24, 25]; tissue shear flow between the notochord and the developing myotome [26]; the interplay between intra-segmental tension and fixed myotome boundaries [14].

Here, we combine quantitative analysis of *in vivo* imaging data with modeling to show that a robust chevron shape emerges from the interplay between short-ranged processes (including cell differentiation and cell neighbour exchanges) and long-ranged mechanical processes mediated by the coupling between developing somites and their surrounding tissues.

**Symmetry breaking in the somite occurs early after segmentation from the PSM:** We imaged somites at subcellular resolution inside the developing embryo, from their segmentation within the PSM (earliest S-2) to mature myotome stage (S5 onward), Fig. 1c-d, Methods, Supplementary Movie 1. Immediately after segmentation, somites are approximately cuboidal [27, 28], Fig. 1d-e and Supplementary Movie 2. Quantifying the somite contours over 8 h, we observe that the process of chevron formation occurs during phases S1 to S5, Fig. 1e and Supplementary Fig. 1. Somite volume is approximately constant during the 7 h following segmentation (Supplementary Fig. 2c). Immediately after segmentation the somites begin to change shape, with flattening in the medial-lateral (ML) axis, leading to an increased contact area with the medially underlying tissues (notochord, neural tube and ventral tissues), Fig. 1e-f, Sup-

69plementary Movie 2 and Supplementary Fig. 1.

70 Concurrently with spreading, we observe symmetry-  
71 breaking in the somite shape along the anterior-posterior  
72 (AP), Fig. 1e. In the medial region a “U” shape emerges  
73 that always points toward the anterior of the embryo.  
74 This “U” subsequently sharpens into the chevron shape,  
75 Fig. 1e.

76 **Chevron angle is impacted by both internal and**  
77 **external factors to the myotome:** The shape of the  
78 myotome is known to be sensitive to a range of per-  
79 turbations [29, 30], including to: (i) signaling pathways  
80 [31, 32]; (ii) the surrounding extracellular matrix (ECM)  
81 [33, 34]; and (iii) the surrounding tissues [35, 36]. Un-  
82 der perturbation, the myotome becomes more “U”-like or  
83 even flat. We are unaware of perturbations that sharpen  
84 the chevron, suggesting that the shape is tightly con-  
85 trolled and may be evolutionarily optimised. We quan-  
86 tified the chevron angle in a range of different condi-  
87 tions, using genetic (*smo*<sup>-/-</sup>, Supplementary Movie 3)  
88 and drug perturbations (Cyclopamine, Shh pathway in-  
89 hibitor, Supplementary Movie 4). We complemented this  
90 with data from the literature, Fig. 1g and Methods Table  
91 1. The chevron angle increases linearly from 90° towards  
92 180° with decreasing slow muscle number. In contrast,  
93 altering of the extracellular matrix at the interfaces of  
94 somites and axial tissues (*e.g.* through *Col15a1a*<sup>MO</sup>,  
95 *Fukutin*<sup>MO</sup> or *lamc1*<sup>-/-</sup>, see Methods Table 1) dras-  
96 tically reduces the chevron angle while the number re-  
97 mains largely unchanged, Fig. 1g. These results suggest  
98 that both muscle cell differentiation (intrinsic to each  
99 somite) and ECM interactions (at the interface between  
100 somites and surrounding tissues) are critical in forming  
101 the chevron.

102 **Somite deformation occurs prior to fast mus-  
103 cle fibre elongation:** Concurrent with the tissue shape  
104 changes, cells within the somite begin differentiation  
105 into specific muscle fibres [17, 20, 21, 27, 37, 38]. The  
106 most-medial layer of cells undergoes differentiation into  
107 slow muscle fibres at the onset of somite segmentation,  
108 Fig. 1b [21]. Slow muscle fibres, which are epithelial-  
109 like before segmentation, rapidly elongate along the AP-  
110 axis until they span the somite compartment. To quan-  
111 tify the dynamics of slow muscle elongation, we used a  
112 Fourier transform method to analyse the evolution in cel-  
113 lular anisotropy within the somite, Fig. 1h-i, Methods  
114 [39]. We find that signatures of future slow muscle fibre  
115 elongation are apparent even before segmentation, and  
116 that these cells rapidly extend over the next 100 min,  
117 Fig. 1j. In contrast, fast fibres elongation occurs sig-  
118 nificantly later, at around 250 min, Fig. 1j. Comparing  
119 with Fig. 1e, we see that the chevron is apparent around  
120 200 min after segmentation, yet fast fibres only fully elon-  
121 gate around this time. Despite fast muscle fibres repre-  
122 senting > 80% of somitic cells, the future myotome ac-  
123 quires the characteristic chevron shape before most of  
124 these cells have begun to elongate.

125 **Spatio-temporal variation in somite-tissue cou-  
126 pling correlates with the chevron shape:** As per-

127 turbations to surrounding tissues and ECM alter the my-  
128 otome shape, we explored the mechanical coupling be-  
129 tween somites and surrounding tissues. We used 2D op-  
130 tic flow to quantify the cellular velocity fields inside the  
131 somites (at different medial-lateral locations) and in the  
132 adjacent notochord and neural tube, Fig. 2a-b, Methods.  
133 We computed the averaged in-plane 2D velocity fields in  
134 the medial-lateral (ML) axis, Supplementary Fig. 3, as  
135 the shear velocities along the ML axis were comparatively  
136 small.

137 To gain insight into the physical coupling between tis-  
138 sues, we focused on relative tissue velocities. We primar-  
139 ily considered the velocity component along the AP-axis  
140 for each tissue ( $V_{\text{not}}$  (notochord),  $V_{\text{som}}$  (somite) and  $V_{\text{NT}}$   
141 (neural tube)), Methods. We define the shear velocity  
142 within the somite  $V_{\text{chev}}$  as the relative difference in the  
143 velocity of cells at the DV-midline and of those in more  
144 dorsal positions, Fig. 2b, along with similar shear ve-  
145 locities between somites and surrounding tissues:  $V_{\text{som}}^{\text{NT}}$   
146 (relative somite velocity compared to neural tube); and  
147  $V_{\text{som}}^{\text{not}}$  (relative somite velocity compared to notochord).  
148 Lastly, we define a shear velocity  $V_{\text{not}}^{\text{NT}}$  between the no-  
149 tochord and neural tube, Fig. 2b.

150 Each of these shear velocities has distinct behaviour,  
151 Fig. 2c, kymographs Fig. 2d-d” and Supplementary  
152 Fig. 4. In agreement with the chevron formation  
153 timescale identified in Fig. 1f,  $V_{\text{chev}} < 0$  during the first  
154 5 h after segmentation, Fig. 2d”. Within this time, the  
155 notochord moves more posteriorly than the neural tube  
156 during chevron formation, as  $V_{\text{not}}^{\text{NT}}$  remains positive after  
157 segmentation, Fig. 2c. Hence, somites are not passively  
158 deformed by an underlying tissue shear, in which case the  
159 chevron would point toward the embryo posterior. Soon  
160 after segmentation  $V_{\text{som}}^{\text{NT}} \approx 0$ , implying that the somite  
161 and neural tube move concomitantly, Fig. 2c,d. Simi-  
162 larly, before segmentation, future somites and notochord  
163 move concomitantly, Fig. 2d”. In contrast,  $V_{\text{som}}^{\text{not}} < 0$   
164 throughout the 6 h after segmentation, Fig. 2c,d”, im-  
165 plying that somites move in the anterior direction relative  
166 to the notochord.

167 We complemented this analysis with live imaging of  
168 embryos injected with lyn-Kaede, Methods. By switching  
169 the Kaede at a somite boundary, we observed the differ-  
170 ential movement of the notochord and neural tube with  
171 respect to the somite, Fig. 2g, consistent with the above  
172 velocity maps. From these observations, our hypotheses  
173 are: (i) that somites and neural tube are weakly mechan-  
174 ically coupled prior to segmentation but strongly linked  
175 after segmentation; (ii) that somites and notochord are  
176 mechanically coupled prior to segmentation and uncou-  
177 pled afterwards.

178 **Mechanical coupling between tissues varies in  
179 time:** To explore whether temporal changes in the rel-  
180 ative movements between tissues are correlated with  
181 changes in physical interactions between these tissues, we  
182 examined the distribution of actin and the ECM compo-  
183 nent laminin, [40], Fig. 2e-f and Supplementary Movie 5-  
184 6. Before segmentation, future somitic cells are in contact

with the notochord, Fig. 2f, while after segmentation, a gap between these cells and the notochord emerges, together with the appearance of large actin fibres. Such loss of contact suggests a reduced friction between the notochord and the slow muscle fibres.

In contrast, cells in the PSM appear in contact with the neural tube, with progressive actin accumulation between the tissues, Fig. 2e. After segmentation, a layer of laminin appears between the somitic cells and the neural tube, Fig. 2e', which suggests that mechanical coupling between the neural tube and somitic cells further increases. Other molecules could also contribute to adhesion, *e.g.* integrin and fibronectin, whose localisation are tightly regulated during somite formation [41].

Following [42, 43], we expect strongly (weakly) adhered tissues to have a high (low) effective interfacial friction coefficient. Such a framework has proved fruitful in understanding tissue-tissue interactions during early zebrafish morphogenesis [44]. Below, we incorporate this idea - along with somite spreading and cell differentiation - within a vertex model to test how tissue-tissue coupling drives the chevron shape of the myotome.

**Simulating tissue shape formation within a vertex model:** The chevron first emerges on the medial side of the somite, which includes slow muscle fibres and the most-medial future fast fibres. We simulate an average 2D layer of cells located within this medial compartment of each somite, Fig 3a. We do not distinguish specific muscle types.

Each cell is described by a polygon whose summits, called vertices and denoted by  $X_i$ , correspond to the edges of cell-cell interfaces. Cellular movements and deformations are described through the dynamics of the cell vertices, which is set by the following force-balance equation:

$$\nu_i \dot{X}_i = \nabla_{X_i} E + F_{\text{elongation}}.$$

This equation has three critical elements. (i) spatially-dependent friction:  $\nu_i$  represents the friction on vertex  $i$  exerted by the underlying tissues, (ii) active stress forces, denoted  $F_{\text{elongation}}$  which are generated by the elongation of slow muscle fibres, Methods, and (iii) cell-scale forces regulating cell shape,  $\nabla_{X_i} E$ . Following [45], we consider

$$E = \sum_{C,I} \left[ \lambda (A_C - A_0)^2 + \beta (P_C - P_0)^2 + \gamma_I L_I \right],$$

where  $A_0$  ( $P_0$ ) represents the preferred area (perimeter) of a cell  $C$ ,  $A_C$  ( $P_C$ ) the actual area (perimeter) of a cell at a given time, and  $L_I$  the length of cell-cell interface  $I$ , Methods.  $\lambda$  represents the pressure forces involved in cell area regulation, while  $\beta$  and  $\gamma_I$  represent the strength of cell- and interface-dependent tensions respectively. Following [46], we introduce stress fluctuations through stochastic modulation in the tension of each cell-cell contact, Methods. After segmentation, no cellular exchanges with neighbouring somites are observed.

We model this compartmentalisation by increasing the tension  $\gamma$  along the somite/somite boundaries, Fig. 3b, Methods. Lastly, to simulate growth and division within the PSM and tailbud, we continuously add new cells at the posterior end of the tissue, at a rate determined by the segmentation clock [16].

**Somite spreading and differential friction are sufficient to generate a shallow chevron shape:** We first tested in the model the effects of spatially varying friction and somite spreading. To simulate the wave of spreading we varied the target area of each cell  $A_0$ :  $A_0(t, x) = A_0 + (A_f - A_0) \exp(-(t - \tau_{\text{seg}}^N)/\tau_{\text{spread}})$  with  $\tau_{\text{spread}} = 200$  min extracted from experiment, Fig. 3c-c', and  $\tau_{\text{seg}}^N$  is the segmentation date of the  $N$ -th somite. During spreading, each cell has a constantly increasing target area and hence exerts pushing forces on its neighbouring cells. We first considered somite spreading with uniform friction, Fig. 3c". Along the DV axis of the somite, all cells have the same target area and spread together. However, along the AP axis the cells are not at the same stage of spreading. Newer (and subsequently smaller) somites have a higher spreading rate than more anterior (older) somites, resulting in a net force along the central part of more anterior somites and a slight bending towards the head occurs. However this bending is insufficient to irreversibly deform the somites; they relax once spreading is finished, Supplementary Movie 7.

We next introduced spatially inhomogeneous friction within the model, Fig. 3d-d';  $\nu_i$  depends on vertex position  $X_i$ . After segmentation, we increase the friction coefficient over the neural tube and ventral tissues while decreasing the friction coefficient over the notochord, Fig. 3d'. Combining spreading with non-uniform friction gives rise to clear symmetry breaking, with somites deforming into a shallow chevron, Fig. 3d" and Supplementary Movie 8. As cells lying above the notochord slide faster than those located more dorsally, the stress associated to the somite spreading creates a DV-shear that deforms somites into a U shape. Such tissue deformation also alters individual cell shapes. If the tissue is sufficiently plastic (*i.e.* frequent cell rearrangements), then cell rearrangements relieve stress induced by the shape changes, resulting in a sharpening of the somite boundary and the emergence of a stable but shallow chevron in early somites. However, this shape does not propagate to younger somites as tissue spreading is insufficiently rapid to trigger cell rearrangements in later segments. Therefore, incorporating realistic parameters (derived where possible from experiments) within such a model cannot generate a sharp chevron similar to wildtype embryos.

**Active stress due to muscle fibre differentiation modulates chevron angle:** Slow muscle fibres start to elongate soon after somite segmentation from the PSM, Fig. 1j. Such elongation likely exerts a shear stress on the more lateral layers of future fast muscle fibres. To model the mechanical constraints imposed by the layer of slow muscle fibre, we used active gel theory, which

297 is a hydrodynamic description of the acto-myosin cortex  
298 that encompasses contractility and filament polymerisa-  
299 tion through a local active stress tensor [47], Methods.  
300 We considered a traceless active stress to discriminate its  
301 contribution from somite spreading. The positive compo-  
302 nent (extension) of the active stress is orientated along  
303 the AP-axis, in line with muscle fibre elongation, with  
304 a corresponding negative component (contraction) orien-  
305 tated along the DV-axis, Fig. 3e. We assume that the  
306 active stress is maximal at the start of slow muscle elon-  
307 gation, with a further linear decrease to zero by the end  
308 of slow muscle elongation, Fig. 3e', which leads to a con-  
309 vergence (DV-axis)-extension (AP-axis) wave within the  
310 somites. The inclusion of such orientated active stress is  
311 then sufficient to shape the tissue into a stable and sharp  
312 chevron shape, Fig. 3e'' and Supplementary Movie 9.

313 **Model predictions for myotome shape under per-**  
314 **turbations:** As shown in Fig. 1g, the chevron shape  
315 changes with slow muscle number. Within our model,  
316 this corresponds to changing the active stress, but leav-  
317 ing other components unchanged. Without active stress,  
318 the model predicts a transient shape deformation in the  
319 somite before relaxing. These dynamics are strikingly  
320 similar to *smo*<sup>-/-</sup> embryos, where there is no slow muscle  
321 specification, Supplementary Movie 3. Intermediate lev-  
322 els of active stress in the model result in reduced chevron  
323 angle, as observed experimentally, Fig. 3f. Perturbations  
324 to the interactions between tissues (*e.g.* *Col15a1a*<sup>MO</sup>)  
325 likely change tissue-tissue coupling, thereby reducing the  
326 effects of differential friction. Reducing friction hetero-  
327 geneity within the model (while keeping active stress)  
328 results in a mild but stable bending of the myotome,  
329 consistent with experiments, Fig. 3f and Supplementary  
330 Movie 10.

331 **Dynamics of chevron formation:** We next challenge  
332 the model capacity to reproduce the tissue dynamics ob-  
333 served during chevron formation. In both experiments  
334 and simulations, we quantified the tissue velocity, Fig. 4a,  
335 anisotropic strain rate (ASR), Fig. 4b and isotropic strain  
336 rate, Supplementary Fig. 6. By definition, the ASR pro-  
337 vides the local tissue expansion direction. Common fea-  
338 tures between the ASR fields in experiments and simu-  
339 lations (Fig. 4a',b') are: (i) in S1, somites undergo DV-  
340 convergence and AP-extension (purple bars, Fig. 4b),  
341 correlating with the onset of slow muscle elongation,  
342 Fig. 1j; (ii) in S2 somites, the ASR is near zero, (iii)  
343 from S3 to S6, somites undergo shear between central  
344 and lateral regions.

345 Our interpretation of the ASR field is that active elon-  
346 gation of slow muscle cells is maximal at somite S1, gen-  
347 erating an extensile stress along the AP-axis that com-  
348 presses both the PSM and anterior somites. Such com-  
349 pression pattern is similar to the one produced by a single  
350 cell actively extending in a passive tissue, Supplementary  
351 Fig. 5, yet at the larger tissue level. To test this interpre-  
352 tation, we laser ablated a region of newly formed somitic  
353 tissue, Fig. 4c', Supplementary Movie 11 and Methods.

354 We observed a rapid relaxation of neighbouring tissues  
355 towards the ablated tissue, confirming that newly seg-  
356 mented somites are pushing their neighbours.

357 We then investigated the role of tissue plasticity. In a  
358 purely elastic material, the somite shape would eventu-  
359 ally relax, since the shear stresses generated by cell elon-  
360 gation and spreading are transient. A plastic/viscous-  
361 like behaviour is therefore required to acquire a stable  
362 chevron shape. Within the vertex model, we imple-  
363 mented passive cell rearrangements (Fig. 4d). Due to  
364 the shear forces emerging in the model, passive cellu-  
365 lar rearrangements are naturally oriented along the ASR  
366 (Fig. 4f) indicating that the bulk somitic tissue has a  
367 plastic-like behaviour [48].

368 Experimentally, we observe that tissue flows do not  
369 generate large cell deformations, Supplementary Fig. 8,  
370 which suggests the existence of cell rearrangements [49,  
371 50]. Cell divisions can also relax cell shape [49]; however,  
372 we found only infrequent cell divisions during myotome  
373 formation, with less than 10% of cells dividing during  
374 the whole process.

375 We explicitly show how cell rearrangements occur by  
376 tracking cellular shapes in 3D inside S1, S2 and S3  
377 somites using high temporal resolution movies, Fig. 4d'  
378 and Supplementary Movie 12. To correlate them with  
379 the ASR, we superimposed the rearrangements in time  
380 over an ASR field map, Fig. 4e,e' and Methods. Cellular  
381 rearrangements are indeed closely aligned with the ASR,  
382 Fig. 4f, in agreement with our theoretical predictions.

383 While intra-somite cell rearrangements are needed,  
384 inter-somite cell exchanges ought to be prevented to  
385 preserve the somite shape. Based on our simula-  
386 tions, we expect somite-somite interfaces to be rough in  
387 *tbx6*<sup>-/-</sup> embryos, in which somites compartmentalisa-  
388 tion is abolished. By using lyn-Kaede to define bound-  
389 aries within *tbx6*<sup>-/-</sup> embryos, we indeed see greater  
390 inter-compartmental mixing, Supplementary Fig. 7b-c.  
391 We note that it has been previously shown that using a  
392 heat-shock inducible Tbx6, somite shape can be rescued  
393 in *tbx6*<sup>-/-</sup> embryos, showing that the chevron forma-  
394 tion is an emergent property, *i.e.* that it is not due to a  
395 template mechanism [51].

396 **Conclusion:** During myotome formation, somites are  
397 under mechanical stress from both internal (somite  
398 spreading, cell elongation) and external (tissue-tissue  
399 coupling) processes. Combining our experimental and  
400 cell-based numerical approaches, we propose the follow-  
401 ing sequence of mechanical events leading to chevron-  
402 shaped myotomes: (i) increased line tension between de-  
403 veloping somites leads to mechanically segmented cell  
404 compartments, Fig. 3b; (ii) somite differential spreading  
405 (Fig. 3c) leads to a pressure gradient along the AP axis,  
406 which, combined with the onset of a differential friction  
407 along the DV axis (Fig. 3d), leads to a buckling instabil-  
408 ity; and (iii) muscle fibre elongation further contributes  
409 to buckling (Fig. 3e), which trigger cell rearrangements  
410 that maintain a stable chevron shape. Our 2D model in-  
411 corporates features resulting from the 3D dynamics of the

412 somite, yet neglects cell heterogeneities within the fast-  
413 muscle cell population, Supplementary Fig. 8. Though  
414 we cannot discount other possible mechanisms, our model  
415 is minimal yet sufficient to recapitulate the dynamics of  
416 somite shape formation in both wildtype and perturbed  
417 embryos.

418 Recent works have shown (i) how active stress can  
419 generate complex flows within *in vitro* tissues [53–55],  
420 (ii) how tissue-tissue friction affects tissue flows during  
421 early zebrafish embryogenesis [44] and (iii) how rheological  
422 properties set the shape of the zebrafish PSM and  
423 tailbud [46]. Here, we integrate these approaches in the  
424 vertex-model framework to understand the shaping of a  
425 functional organ in terms of the interplay between (i) ac-  
426 tive stresses generated by muscle cell differentiation, (ii)  
427 spatially heterogeneous friction and (iii) tissue plasticity.

428 It is interesting to compare with somite formation in  
429 other vertebrate systems, such as the chicken and mouse  
430 embryos whereby somites do not acquire a chevron shape.  
431 While in our model the notochord needs to be centred to  
432 generate the chevron shape, in mouse and chick embryos  
433 the notochord is off-centred and located towards the ven-  
434 tral border (see Supplementary Fig. 9). Given such tissue  
435 arrangement, we do not expect somites to buckle, even

436 in the presence of differential tissue-tissue frictions [56].  
437 Therefore, our work suggests that both tissue-tissue in-  
438 teractions and tissue positioning can play a key role in  
439 shaping organs.

440 **Acknowledgements** We thank Philip Ingham for sup-  
441 port with zebrafish experiments. We acknowledge fund-  
442 ing from a Singapore National Research Foundation  
443 Fellowship awarded to T.E.S. (grant No. 2012NRF-  
444 NRFF001-094), an HFSP Young Investigator Grant  
445 awarded to T.E.S. (grant no. RGY0083/2016), and the  
446 Mechanobiology Institute. Fish facilities were provided  
447 by the Institute of Molecular and Cellular Biology, Sin-  
448 gapore. We thank MBI Science Communications for as-  
449 sistance with graphics as well as Olivier Hamant and  
450 François Graner for critical reading of the manuscript.

451 **Author contribution** J.Y. and T.E.S. planned the ex-  
452 periments, S.T. and T.E.S. planned the image analysis,  
453 and S.T., J.-F.R., J.P. and T.E.S. planned the theoret-  
454 ical analysis. J.Y. performed all experiments except laser  
455 ablation (by S.T.). S.T. performed the image analysis.  
456 S. T. and J.-F.R. developed the vertex model with in-  
457 puts from G. W. and J.P., particularly regarding mod-  
458 elling of active stress. S.T., J.-F.R. and T.E.S. wrote the  
459 manuscript, with all authors contributing to manuscript  
460 preparation. We have no competing interests.

- 
- 461 [1] L. A. Baena-López, A. Baonza, and A. García-Bellido, *Current Biology* **15**, 1640 (2005).  
462 [2] S. Hozumi, et al. *Nature* **440**, 798802 (2006).  
463 [3] M. Affolter, R. Zeller, and E. Caussinus, *Nature Reviews Molecular Cell Biology* **10**, 831 (2009).  
464 [4] I. K. Hariharan, *Developmental Cell* **34**, 255 (2015).  
465 [5] O. Hamant, et al. *Science* **322**, 1650 (2008).  
466 [6] M. Uyttewaal, et al. *Cell* **149**, 439 (2012).  
467 [7] N. Hervieux, et al. *Current Biology* **27**, 3468 (2017).  
468 [8] A. A. Green, et al. *PLoS Biology* **8**, e1000537 (2010).  
469 [9] S. Sauret-Güeto, K. Schiessl, A. Bangham, R. Sablowski, and E. Coen, *PLoS Biology* **11** (2013).  
470 [10] A. B. Rebocho, J. R. Kennaway, J. A. Bangham, and E. Coen, *Current Biology* **27**, 2610 (2017).  
471 [11] E. Hannezo, et al. *Cell* **171**, 242 (2017).  
472 [12] T. Savin, et al. *Nature* **476**, 57 (2011).  
473 [13] G. Vogel, *Science* **340**, 1156 (2013).  
474 [14] F. Rost, C. Eugster, C. Schroter, A. C. Oates, and L. Bruschi, *Journal of Experimental Biology* **217**, 3870 (2014).  
475 [15] M. Maroto, R. A. Bone, and J. K. Dale, *Development* **139**, 2453 (2012).  
476 [16] A. C. Oates, L. G. Morelli, and S. Ares, *Development* **139**, 625 (2012).  
477 [17] G. E. Hollway and P. D. Currie, *EMBO Reports* **4**, 855 (2003).  
478 [18] P. D. Currie and P. W. Ingham, *Nature* **382**, 452 (1996).  
479 [19] A. K. Maurya, et al., *Development* **139**, 1885 (2012).  
480 [20] M. E. Nguyen-Chi, et al. *PLoS Genetics* **8**, e1003014 (2012).  
481 [21] J. Yin, R. Lee, Y. Ono, P. W. Ingham, and T. E. Saunders, *Developmental Cell* **46**, 735 (2018).  
482 [22] J. J. Videler, *Fish Swimming*, Vol. 10 (Groningen, Springer, 1993).  
483 [23] W. van Raamsdonk, W. Mos, G. Tekronie, C. W. Pool, and P. Mijzen, *Acta morphologica Neerlandica Scandinavica* **17**, 259 (1979).  
484 [24] W. van Raamsdonk, et al. *Zeitschrift für Anatomie und Entwicklungsgeschichte* **145**, 321342 (1974).  
485 [25] S. E. Windner, et al. *Development* **142**, 1159 (2015).  
486 [26] J. S. Turner, *The Tinker's Accomplice* (Cambridge, Harvard University Press, 2010).  
487 [27] H. L. Stickney, M. J. Barresi, and S. H. Devoto, *Developmental Dynamics* **219**, 287 (2000).  
488 [28] D. Soroldoni, et al. *Science* **345**, 222 (2014).  
489 [29] F. J. van Eeden, et al. *Development* **123**, 153 (1996).  
490 [30] F. Cortes, et al. *Developmental Cell* **5**, 865 (2003).  
491 [31] A. K. Maurya, et al. *PLoS Genetics* **9** (2013).  
492 [32] X. Wang, et al. *Biology Open* **2**, 1203 (2013).  
493 [33] A. Pagnon-Minot, et al. *Developmental Biology* **316**, 21 (2008).  
494 [34] Y.-Y. Lin, et al. *Human Molecular Genetics* **20**, 1763 (2011).  
495 [35] J. Odenthal, et al. *Development* **123**, 103 (1996).  
496 [36] C. Anderson, et al. *Molecular bioSystems* **3**, 51 (2007).  
497 [37] S. H. Devoto, E. Melançon, J. S. Eisen, and M. Westerfield, *Development* **122**, 3371 (1996).  
498 [38] C. Wolff, S. Roy, and P. W. Ingham, *Current Biology* **13**, 1169 (2003).  
499 [39] M. Durande, S. Tlili, T. Homan, B. Guirao, F. Graner, and H. Delanoë-Ayari, arXiv:1810.11652 (2018).  
500 [40] B. D. Crawford, C. A. Henry, T. A. Clason, A. L. Becker, and M. B. Hille, *Molecular Biology of the Cell* **14**, 3065 (2003).  
501 [41] D. Julich, A. P. Mould, E. Koper, and S. A. Holley, De-

- 525       velopment **136**, 2913 (2009).
- 526 [42] K. Tawada and K. Sekimoto, *Journal of Theoretical Bi-*  
527 *ology* **150**, 193 (1991).
- 528 [43] S. Walcott and S. X. Sun, *Proceedings of the National*  
529 *Academy of Sciences* **107**, 7757 (2010).
- 530 [44] M. Smutny, et al. *Nature Cell Biology* **19**, 306 (2017).
- 531 [45] R. Farhadifar, J.-C. Röper, B. Aigouy, S. Eaton, and  
532 F. Jülicher, *Current Biology* **17**, 2095 (2007).
- 533 [46] A. Mongera, et al. *Nature* **561**, 401 (2018).
- 534 [47] J. Prost, F. Jülicher, and J.-F. Joanny, *Nature Physics*  
535 **11**, 111 (2015).
- 536 [48] F. Graner, B. Dollet, C. Raufaste, and P. Marmottant,  
537 *European Physical Journal E* **25**, 349 (2008).
- 538 [49] S. Tlili, et al., *Eur. Phys. J. E* **38**, 33/1 (2015).
- 539 [50] G. B. Blanchard, et al., *Nat. Methods* **6**, 458 (2009).
- 540 [51] S. E. Windner, N. C. Bird, S. E. Patterson, R. A. Doris,  
541 and S. H. Devoto, *Biology Open* **1**, 806 (2012).
- 542 [52] K. McDole, et al. *Cell* **175**, 859 (2018).
- 543 [53] A. Doostmohammadi, J. Ignés-Mullol, and J. M. Yeomans,  
544 *Nature Communications* **9**, 3246 (2018)..
- 545 [54] K. Kawaguchi, R. Kageyama, and M. Sano, *Nature* **545**,  
546 327 (2017).
- 547 [55] G. Duclos et al., *Nature Physics* **14**, 728 (2018)..
- 548 [56] B. Bénazéraf, et al., *Development* **144**, 4462 (2017).
- 549 [57] M. J. Barresi, H. L. Stickney, and S. H. Devoto, *Devel-*  
550 *opment* **127**, 2189 (2000).
- 551 [58] S. G. Sheela, W. C. Lee, W. W. Lin, and B. C. Chung,  
552 *Developmental Biology* **286**, 377 (2005).
- 553 [59] J. Malicki, et al. *Development* **123**, 263 (1996).

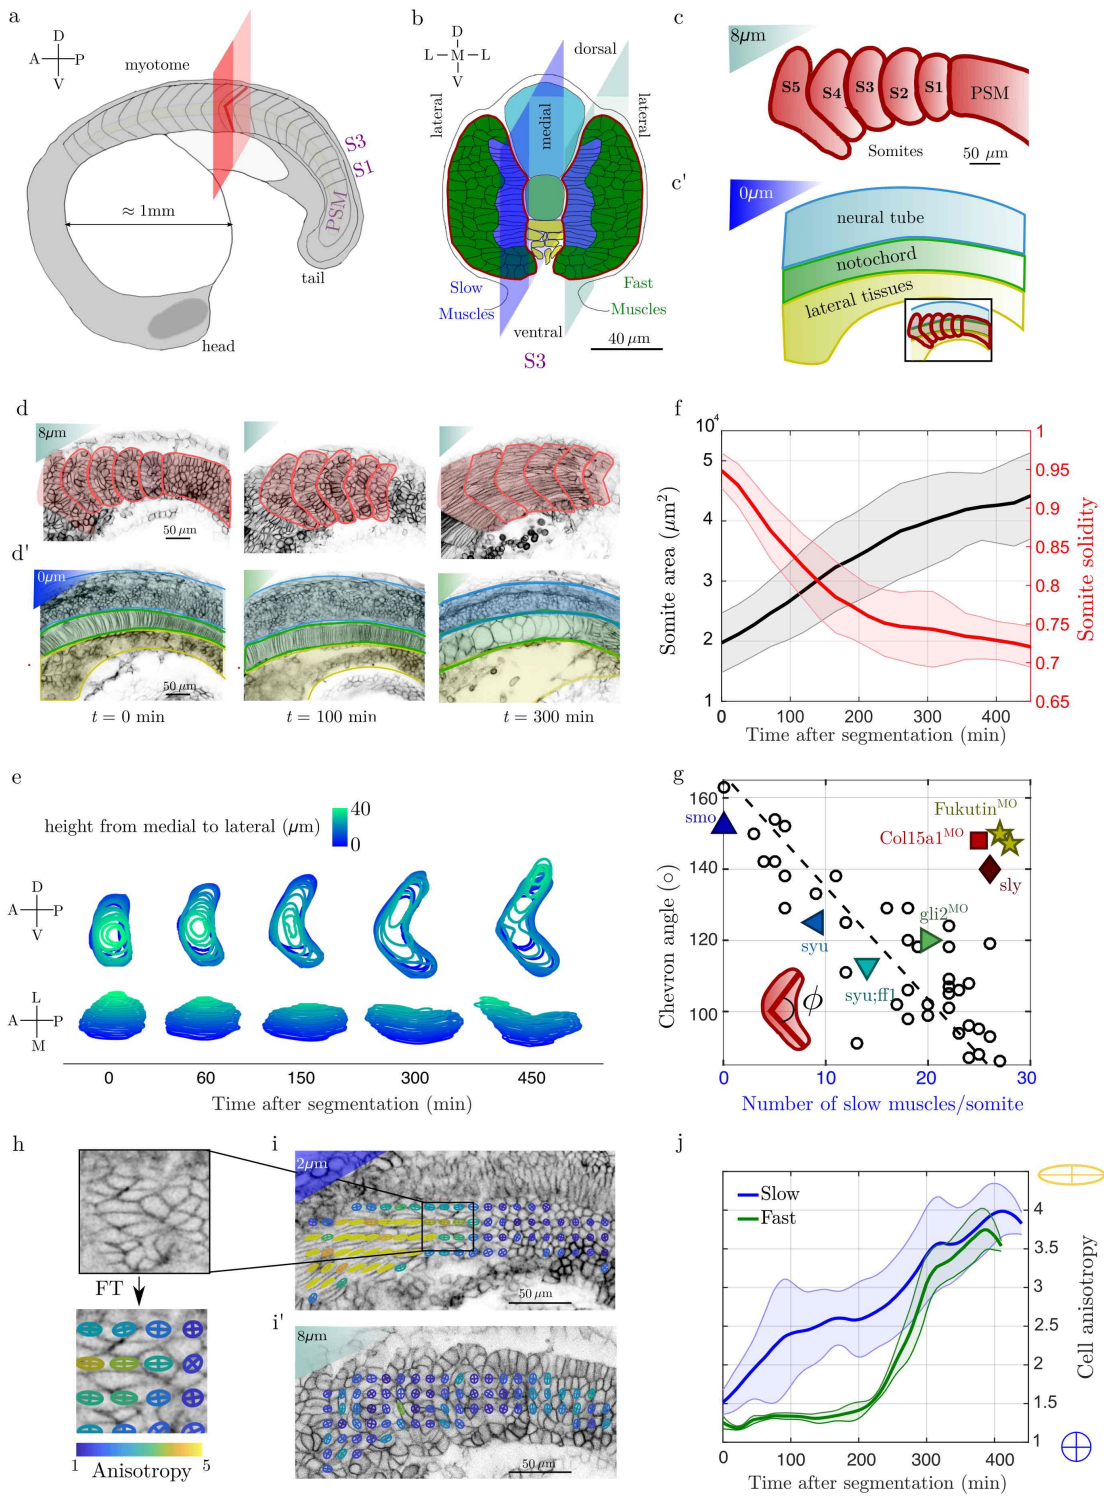

Figure 1. **The chevron architecture of the myotome emerges early after segmentation from the PSM** (a) Sketch of a 21-somite zebrafish embryo. Red plane: transverse plane to the anterior-posterior direction. Two somites, at stages S1 and S3, are highlighted. (b) Sketch of a S3-stage somite ( $t \approx 90$  min post segmentation) in the transverse plane; dark blue (light green) cells are future slow (fast) muscle cells respectively. The dark and light blue planes represent the cross-sectional views shown in c and d. The notochord is at the centre (grey circle), with the neural tube located more dorsally. Ventral tissues not shown for clarity. (c-c') Cartoon of somite shape in transverse view (c, plane lying  $z = 8 \mu\text{m}$  from notochord) and underlying tissues (c', plane crossing the notochord, neural tube and ventral tissues. Inset shows shape of somites superimposed on underlying tissues. (d-d') Confocal images and superimposed contours of (d) somites and PSM (red lines) and (d') neural, notochord and mesoderm tissues (blue, green and yellow lines, respectively) at  $t = 0, 100, 300$  min post segmentation from PSM for the central somite shown in first panel. (e) 3D evolution of somite shape after segmentation from PSM of a representative wildtype embryo shows spreading of somite in DV-axis and emergence of chevron shape at  $\sim 150$  min. (f) Cross-sectional area and solidity (i.e. the ratio of the somite area over the area of its convex hull) of segmented somites for the most medial layer of future fast muscle fibres (as in d) as a function of time after segmentation. Shaded regions represents  $\pm 1s.d.$ . (g) Chevron angle (in degrees) in the layer of most medial future fast muscle fibres against number of slow muscle cells per chevron. Black circles: Cyclopamine treated embryos at different concentrations. Triangles: morpholinos and mutants affecting cell differentiation (dark blue up  $\Delta$ : smo [57], light blue left  $\triangleleft$ : syu [58], cyan down  $\nabla$ : syu+ff1 [58], and green  $\triangleright$ : gli2<sup>MO</sup> [38]). Morpholinos or mutants altering tissue integrity (dark yellow star  $\star$ : Fukutin [34], light red square  $\square$ : Col15a1a<sup>MO</sup> [33], dark red diamond  $\diamond$ : sly [29, 59]). See Methods Table 1 for further details. (h) Fourier transform image analysis method provides a cell elongation field, with the anisotropy represented by ellipsoids (Methods). Cell elongation is along the major axis of the ellipse. (i) Elongation map of future slow (i) and fast (i') muscle fibres. (j) Mean cell anisotropy as a function of time post segmentation for future slow muscle fibres (i, blue) and for the layer of most medial future fast muscle fibres (i', green). Shaded regions represent  $\pm 1s.d.$ . In (f) and (j): average is performed over 11 somites from 6 embryos.



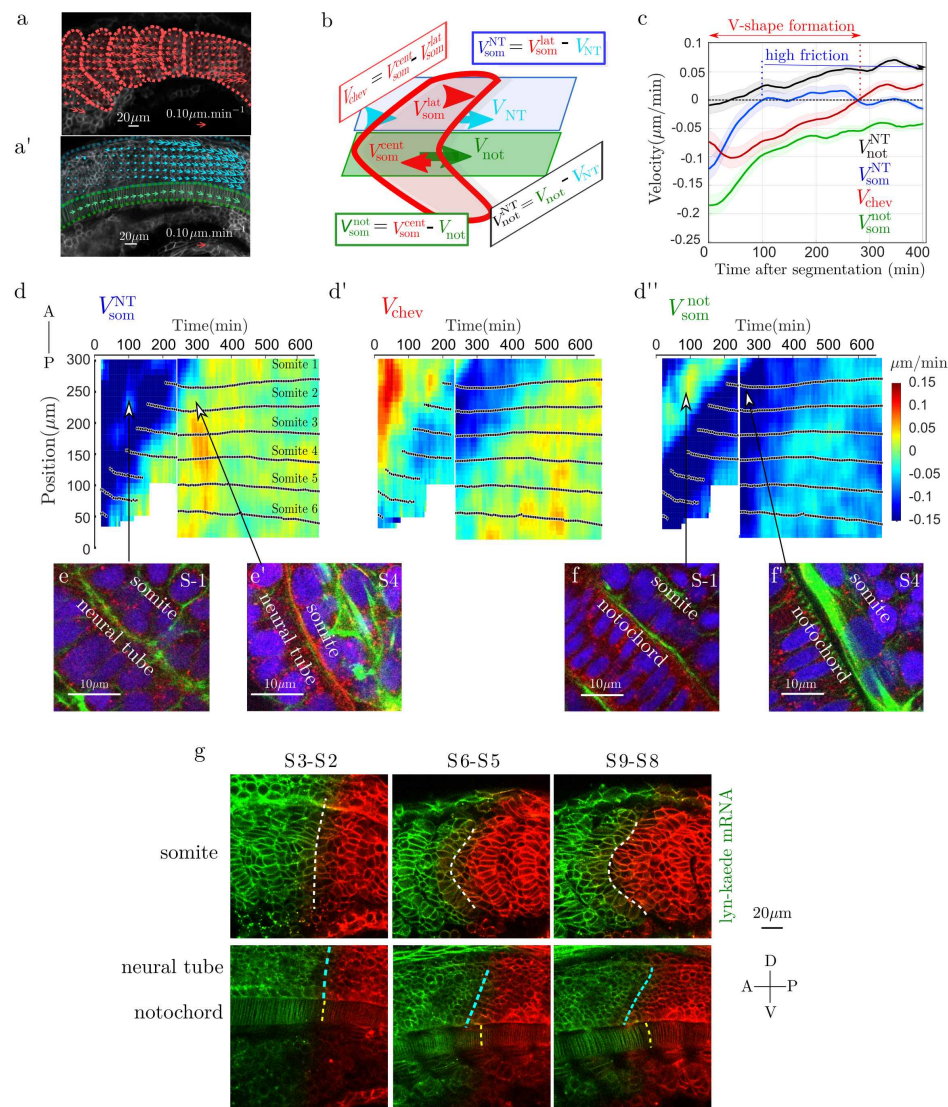

**Figure 2. Differential tissue flow and heterogeneous mechanical coupling between tissues correlates with the emergence of a chevron shape.** (a-a') Velocity fields estimated by Optic Flow (Methods) within the somite (red arrows, a), neural tube (cyan, a') and notochord (green, b'). (b) Definition of the mean anterior-posterior (AP) velocities within each tissue: neural tube (NT, cyan), notochord (not, green) and somites (som, red). (c) Evolution of the relative tissue AP velocities (average performed on  $n = 11$  somites from  $N = 5$  embryos) after segmentation from the PSM. Negative values of the shear strain rate  $V_{chev}$  represent the period of chevron shape emergence. Near zero values of  $V_{som}^{NT}$  for  $t > 100$  min post-segmentation indicate the onset of a large friction between the notochord and somites. Shaded regions represent  $\pm 1s.d.$  (d-d'') Kymographs of shear velocities  $V_{som}^{NT}$ ,  $V_{chev}$  and  $V_{som}^{not}$  shows somite-to somite reproducibility of the features identified in (c). Each panel from two embryos, with stitching at  $t = 220$  min. Black dots indicate the position of each somite centre of mass along the AP axis, with somite labelling representing somite number with respect to the start of the movie. In (d'), negative shear (blue coloured region) indicates the region where the chevron shape emerges in the somite. (e-f) Confocal images of actin (green), laminin (red) and nuclei (blue) in the transverse plane to the AP-axis for somites S-1 and S4 (scale bar:  $10 \mu\text{m}$ ); (e) Closeup of the somite/neural tube interface. Arrows highlight correlation between actin and laminin localisation with the corresponding tissue-tissue flows shown in d. (f) Closeup of the somite/notochord interface. Arrows highlight correlation between actin and laminin localisation with the corresponding tissue-tissue flows shown in d''. (g) Lyn-Kaede showing relative movement of the somites (top) with respect to the underlying notochord and neural tube (lower) from S2 to S9, with photo-switching of Kaede performed at S2 stage in the more posterior somites, Methods. Dashed lines highlight interfaces between the two fluorescent regions.

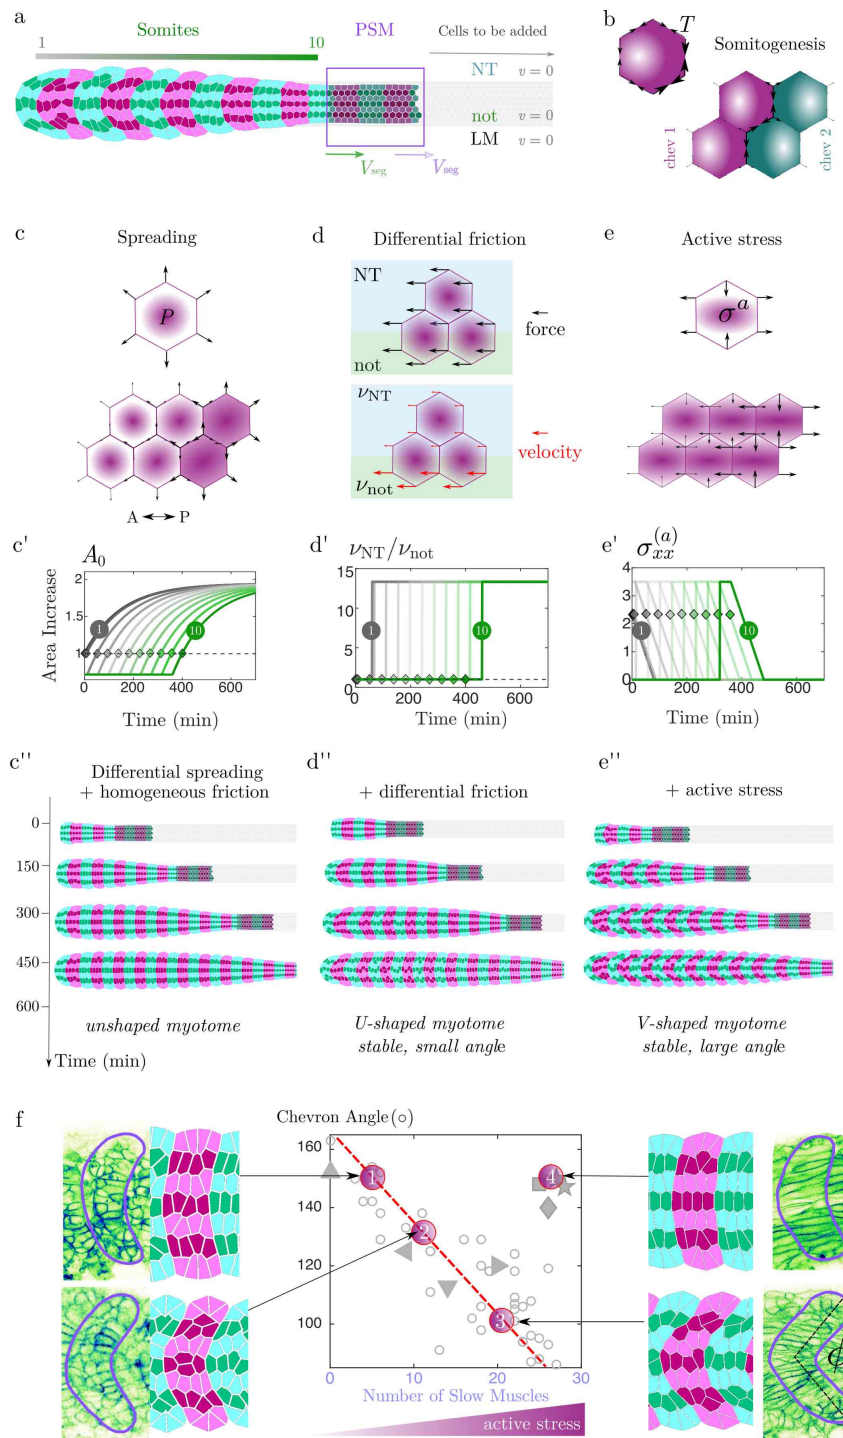

Figure 3. **The chevron shape emerges in a vertex model incorporating somite spreading, differential friction and active stress.** (a) Simulated geometry used in model. The number of simulated cells increases with time as new cells are progressively added from the tailbud region (highlighted by purple region); magenta (green) cells belong to somite number  $2N$  ( $2N + 1$ ) respectively. New somites appear at a velocity  $V_{\text{seg}} = 1 \text{ somite}/(30 \text{ min})$ . (b-e) Principle elements included within the vertex model: (b) Somite segmentation is implemented through an increased tension at the somite compartment boundaries. (c) Differential spreading is implemented through a wave of increased cellular pressure along the AP axis, leading to a spatial modulation of outward forces (black arrows). (c') Exponential increase in the somite target area as a function of time, based on experimental measurements. Grey curve (dark green) corresponds to first (last) somite formed in simulation (diamonds indicate timing of segmentation of specific somite from PSM, a). (c'') Simulations with differential spreading only (*i.e.* homogeneous friction): somites do not buckle. (d) The vertex displacement (red arrow) is spatially modulated by an inhomogeneous friction coefficient  $\nu$ , where  $\nu = \nu_{\text{NT}} = \nu_{\text{LM}}$  for vertices over the neural tube and ventral tissues; and  $\nu = \nu_{\text{not}}$  otherwise. (d') The ratio of friction between the somite and neural tube and the somite and notochord, implemented as a step function (related to Fig. 3e-f). (d'') Simulations with somite spreading and differential friction: somites fail to form a long-ranged sharp chevron shape. (e) An imposed bulk active stress  $\sigma^{(a)}$  leads to elongation forces along the AP axis (black arrows). (e') Active stress is set to be maximal for each somite soon after segmentation, corresponding to slow muscle fibre elongation. (e'') Simulations with active stress and differential friction (wildtype case): somites acquire a stable chevron shape. (f) Comparison of experimentally measured chevron angle (Fig. 1g) with the angle measured for four simulation outcomes. Only the active stress level is varied from points 1 to 3 (all other parameters fixed), describing embryos treated with  $50 \mu\text{mol}$  (1),  $10 \mu\text{mol}$  (2) of Cyclopamine and wildtype embryos (3). (4) corresponds to the homogeneous friction case, describing the perturbed tissue-tissue coupling of  $\text{Col15a1a}^{\text{MO}}$ .

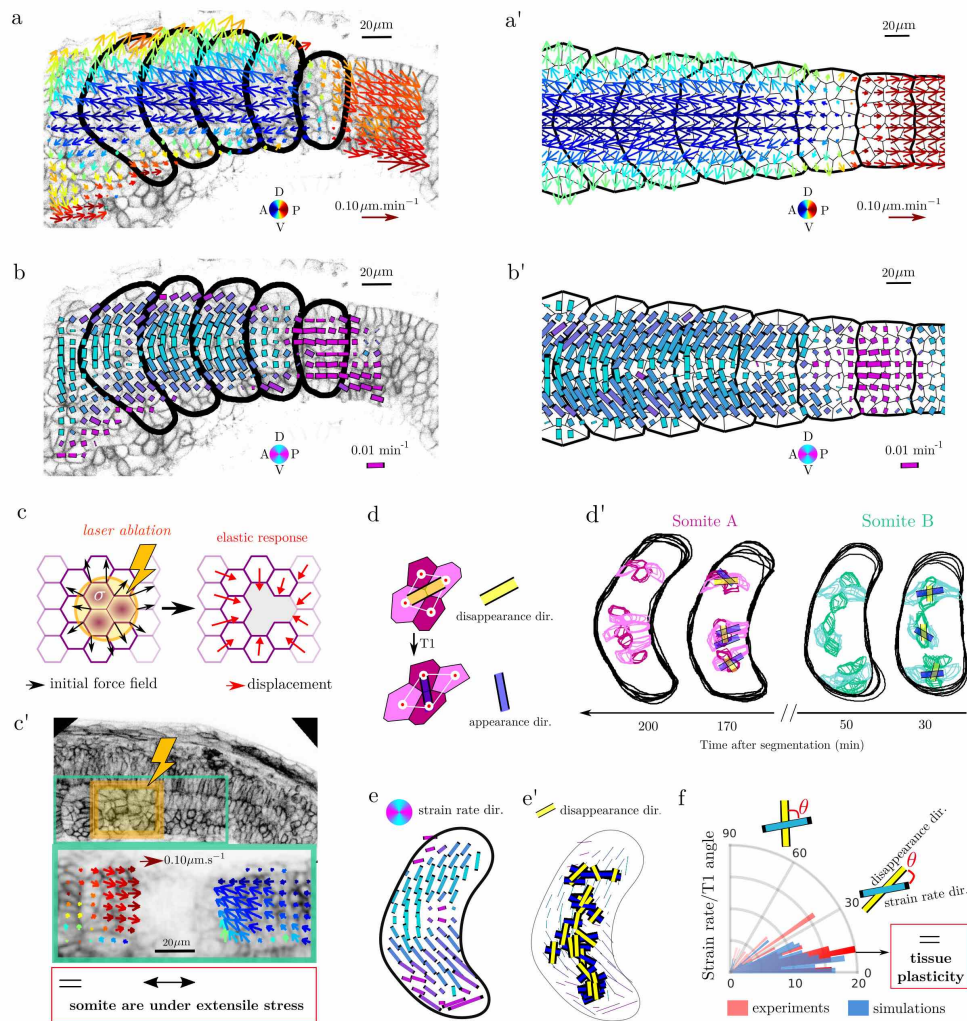

**Figure 4. Model accurately predicts forces within the somite and orientation of cellular rearrangements.** (a-a') Comparison of velocity field in (a) experiments and (a') simulations, measured using optic flow, Methods. Arrow colour represents direction and length represents speed. (b-b') Comparison of the anisotropic component of the strain rates (ASR) in (b) experiments and (b') simulations (magenta: AP orientation; cyan: DV orientation). Bar color represents orientation and length represents the strain rate magnitude (see Methods). (c) Cartoon of predicted relaxation direction upon ablation of somitic tissue. (c') (Top) Laser ablation (yellow box) of somites at stage S0 and S1. (Bottom) Zoomed in region highlighted above, with arrows representing tissue velocity from optic flow analysis in the 10 s after ablation. Colour coding as a). (d) Scheme of cellular rearrangements, with cells losing contact joined by yellow bar and cells forming new contacts by blue bar. (d') Experimental examples of 3D cellular rearrangements at different somite stages for 2 somites. (e) Time and ensemble averaged ASR ( $n = 4$  somites). (e') Accumulated cell rearrangements orientations (across 4 somites) superimposed on the ASR map. (f) Rose plot alignment of cellular rearrangement with ASR in experiments ( $n = 44$  from 4 somites) and simulations ( $n = 60$  from 6 simulated somites).
